# Supplementary material for: SOD3 Is a Non-Mutagenic Growth Regulator Affecting Cell Migration and Proliferation Signal Transduction
Source: MDPI journal article supplement (doi:10.3390/antiox10050635), 2021-04-21
Supplement: s1 [file s1]

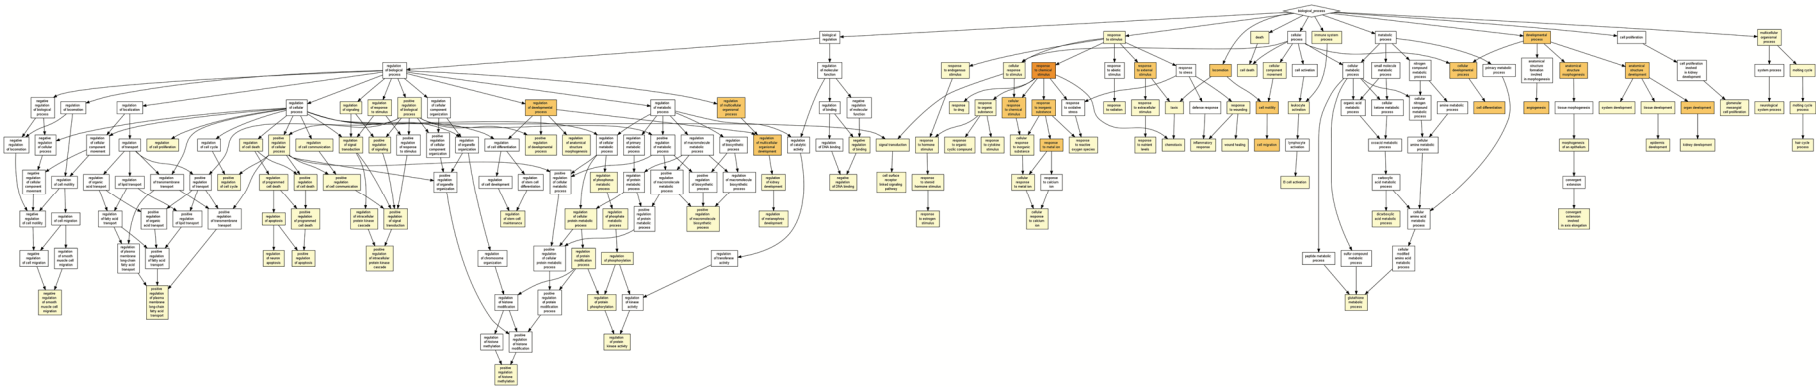

**Figure S1. Gorilla analysis.** Biological process pathways affected by SOD3 in TPC1 cells modeling papillary thyroid cancer.

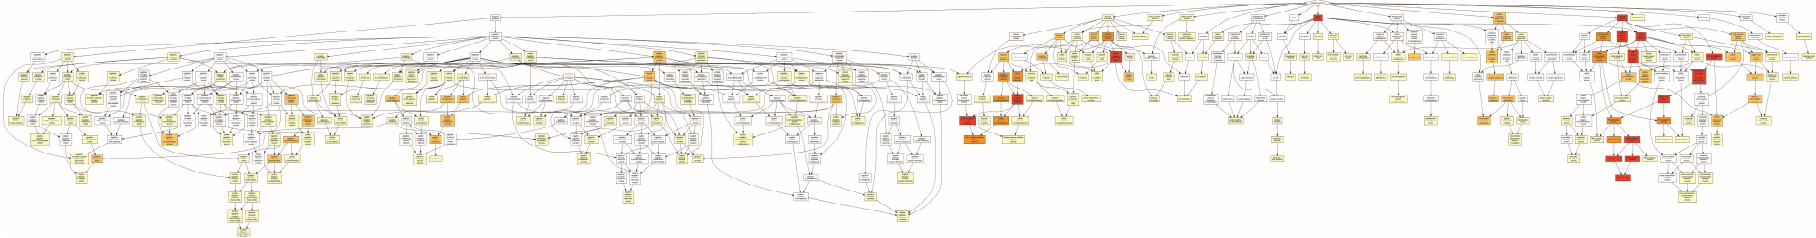

**Figure S2. Gorilla analysis.** Biological process pathways affected by SOD3 in 8505c cells modeling anaplastic thyroid cancer.

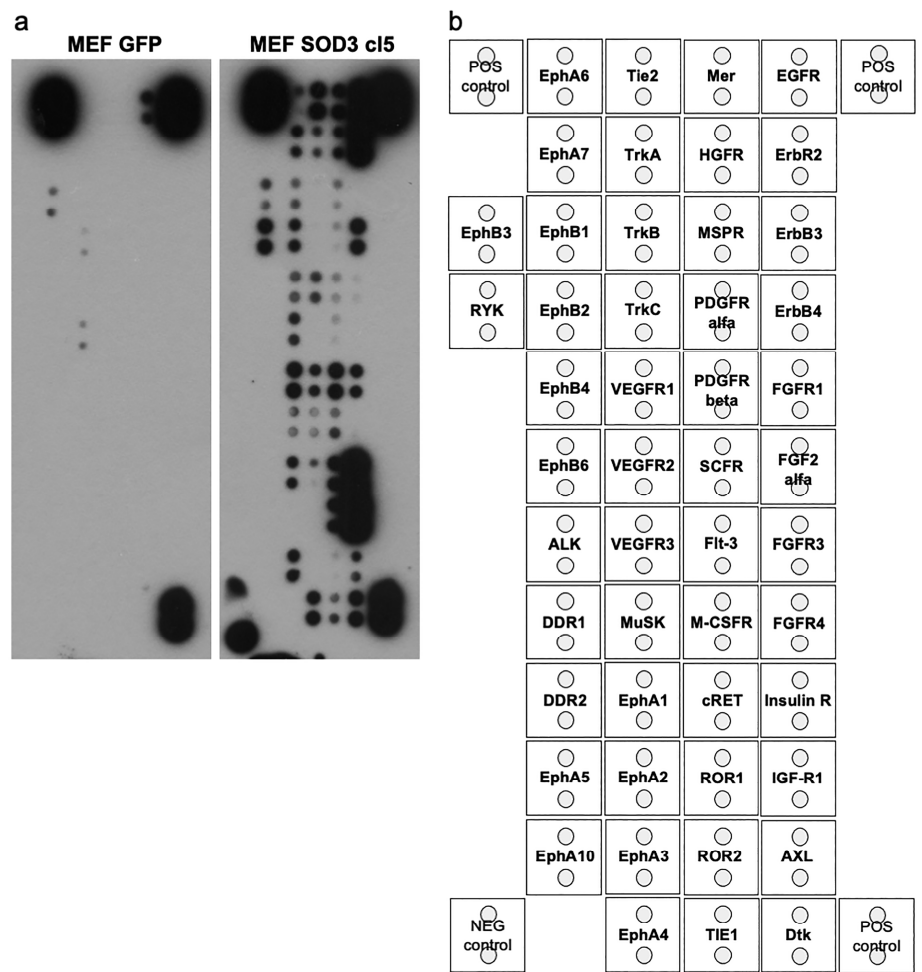

**Figure S3. RTK array.** a. Protoarray long exposure for MEF GFP and MEF SOD3 cl5. b. The locations of the signaling molecules on the membrane.

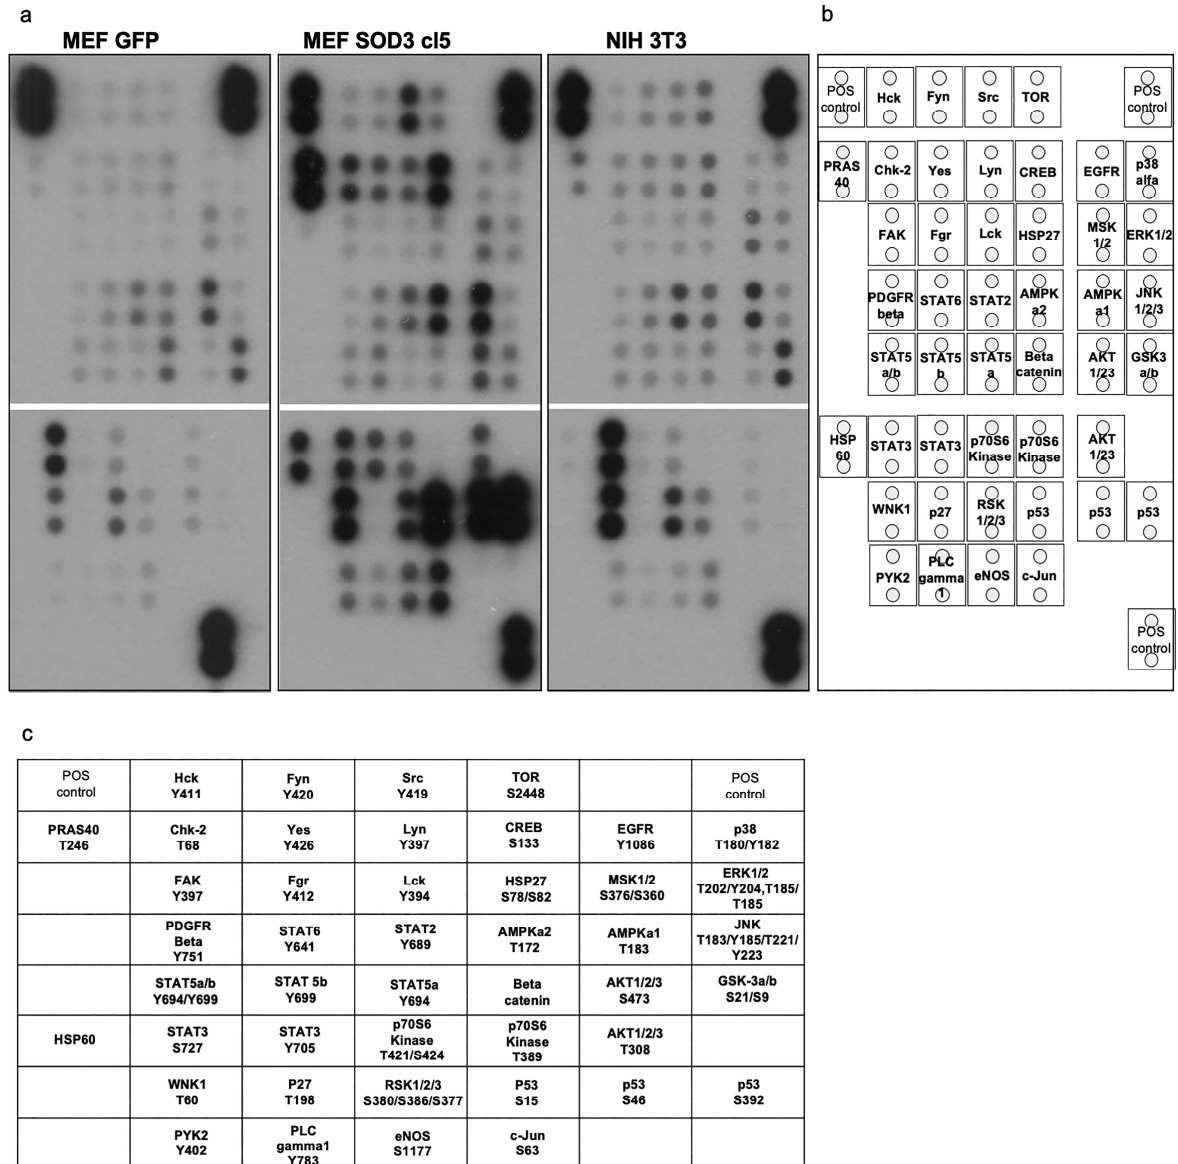

**Figure S4. RTK array.** a. Protoarray long exposure for MEF GFP, MEF SOD3 c15, and NIH3T3 cells. b. The location of the signaling molecules on the membrane. c. Table showing the phosphorylation site in the kinases.

**Table S1.** PCR primers that were used in the expression analysis.

|                          |                               |
|--------------------------|-------------------------------|
| <b>huDNA lig-I For</b>   | GCT TCC ACC GAT TCC TCC TC    |
| <b>huDNA lig-I Rev</b>   | GAG CAC ACT GGG AAA ATG CC    |
| <b>huDNA lig-III For</b> | GCC GGA GAG GCA GCT ATA TG    |
| <b>huDNA lig-III Rev</b> | CAC GCC AGT GAT GTT TTC GG    |
| <b>huMPG For</b>         | GCC CAT ACC GCA GCA TCT AT    |
| <b>huMPG Rev</b>         | CCT CGG AGT TCT GTG CCA TT    |
| <b>huUNG For</b>         | CTC ATA AGG AGC GAG GCT GG    |
| <b>huUNG Rev</b>         | AGG GAT GAG CCG TCT GTA GT    |
| <b>huOGG1 For</b>        | AGG AAA GCC GGA GAA TTG GG    |
| <b>huOGG1 Rev</b>        | GAC GAG GAC CAC GAC CCT TA    |
| <b>huNTH1 For</b>        | GGA CAG TGA GAA AGG TGA GGC T |
| <b>huNTH1 Rev</b>        | GTC CAC AGG TGC ATC CTT TTT G |
| <b>huNEIL1 For</b>       | GTC ACT CAG TGC CCA AGG AA    |
| <b>huNEIL1 Rev</b>       | CCT GGA ACC AGA TGG TAC GG    |
| <b>huNEIL2 For</b>       | ATG GGT TAC AGA GGC TCA CCT   |
| <b>huNEIL2 Rev</b>       | AGA CGT CAG GTT CCC CAA CG    |
| <b>huNEIL3 For</b>       | TGG AAG TGC AGC TCA CCA AA    |
| <b>huNEIL3 Rev</b>       | AGC ACA TCA CCT AGC ATC CG    |
| <b>huTDG For</b>         | CTC TGG GGT TGT CTT ACC GC    |
| <b>huTDG Rev</b>         | CTG AAG GGA ATA GCT GCC CG    |
| <b>huMBD4 For</b>        | GCG CTT TCG CAA CAT TCA GA    |
| <b>huMBD4 Rev</b>        | CCC CAG ACT CAG ACT CTC CA    |
| <b>huSMUG1 For</b>       | TAA ACG ACC AGT GCT GGG AC    |
| <b>huSMUG1 Rev</b>       | AGC CAG GTC TTC TGA CTT GC    |
| <b>huACTIN For</b>       | TGC GTG ACA TTA AGG AGA AG    |
| <b>huACTIN Rev</b>       | GCT CGT AGC TCT TCT CCA       |
